# Supplementary material
Source: PubMed Central journal article supplement (PMC10520266)
Supplement: hpeds.2023-007246SupplementaryData.pdf [file hpeds.2023-007246SupplementaryData.pdf]

# Supplemental Information

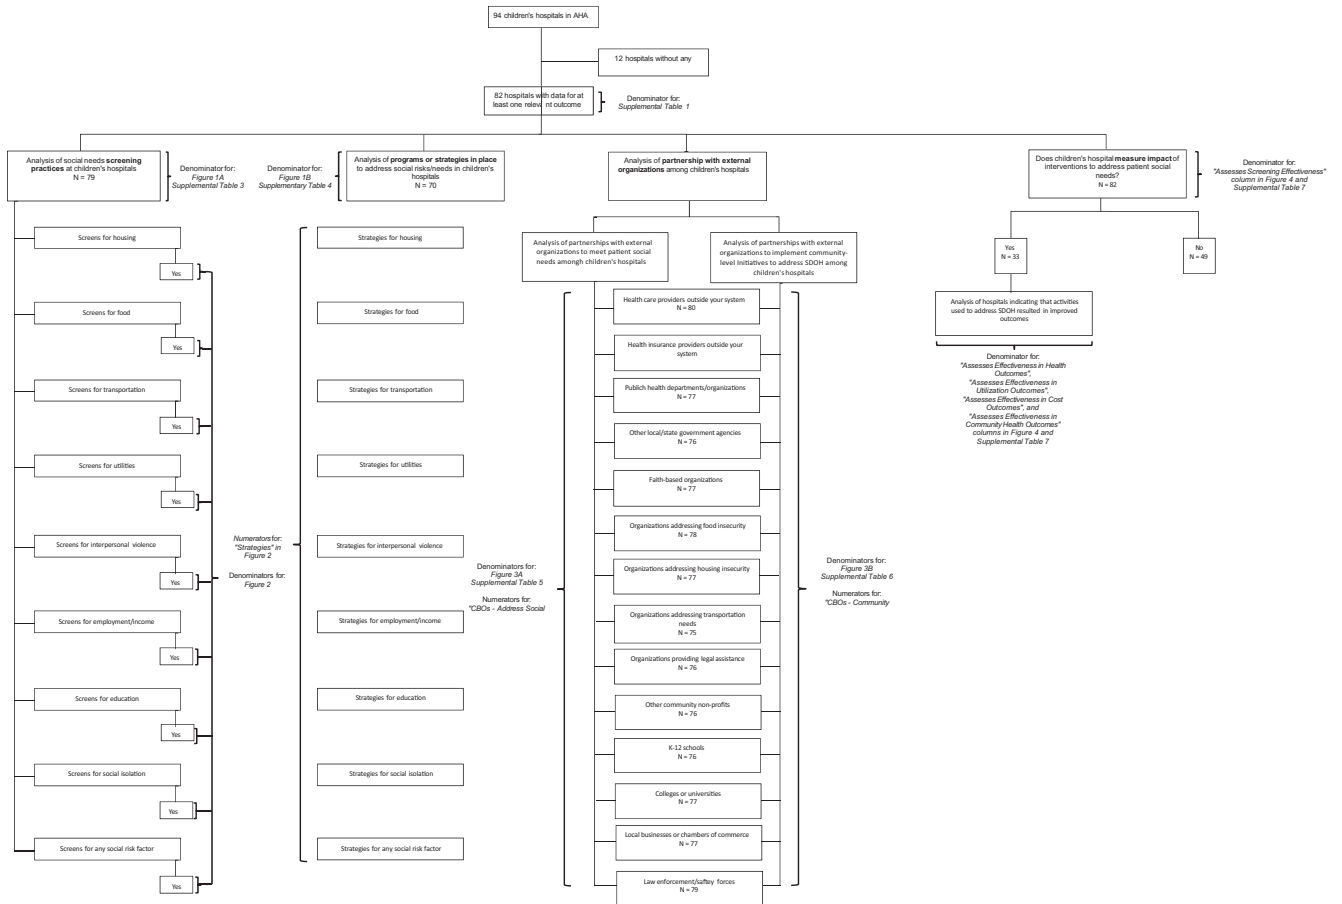

**SUPPLEMENTAL FIGURE 5** Sample selection flowchart.

| <b>SUPPLEMENTAL TABLE 1</b> Characteristics of Children's Hospitals with at Least 1 Outcome Variable of Interest |                      |
|------------------------------------------------------------------------------------------------------------------|----------------------|
| <b>Characteristic</b>                                                                                            | <b><i>N</i> = 82</b> |
| Bed size, %                                                                                                      |                      |
| <100                                                                                                             | 47.6                 |
| 100–400                                                                                                          | 43.9                 |
| >400                                                                                                             | 8.5                  |
| Ownership, %                                                                                                     |                      |
| Non-federal government                                                                                           | 6.1                  |
| Nonprofit                                                                                                        | 82.9                 |
| For profit                                                                                                       | 11.0                 |
| Large Medicaid population, %                                                                                     |                      |
| No                                                                                                               | 18.3                 |
| Yes                                                                                                              | 81.7                 |
| Teaching status, %                                                                                               |                      |
| Major teaching                                                                                                   | 18.3                 |
| Minor teaching                                                                                                   | 61.0                 |
| Nonteaching                                                                                                      | 20.7                 |
| Region, %                                                                                                        |                      |
| Northeast                                                                                                        | 11.0                 |
| Midwest                                                                                                          | 22.0                 |
| South                                                                                                            | 47.6                 |
| West                                                                                                             | 19.5                 |

**SUPPLEMENTAL TABLE 2** Missing Data by Type of Outcome Variable

| Characteristic               | Missing Screening Data (N = 15) | Not Missing Screening Data (N = 79) | P    | Missing Strategies Data (N = 24) | Not Missing Strategies Data (N = 70) | P     | Missing Partner Data (N = 25) | Not Missing Partner Data (N = 69) | P     | Missing Impact Tracking Data (N = 12) | Not Missing Impact Tracking Data (N = 82) | P    |
|------------------------------|---------------------------------|-------------------------------------|------|----------------------------------|--------------------------------------|-------|-------------------------------|-----------------------------------|-------|---------------------------------------|-------------------------------------------|------|
| Bed size, %                  |                                 |                                     |      |                                  |                                      |       |                               |                                   |       |                                       |                                           |      |
| <100                         | 73.3                            | 46.8                                | .161 | 70.8                             | 44.3                                 | .063  | 64.0                          | 46.4                              | .282  | 57.7                                  | 47.6                                      | .177 |
| 100-400                      | 20.0                            | 44.3                                |      | 20.8                             | 47.1                                 |       | 32.0                          | 45.5                              |       | 34.6                                  | 43.9                                      |      |
| >400                         | 6.7                             | 8.9                                 |      | 8.3                              | 8.6                                  |       | 4.0                           | 10.1                              |       | 7.7                                   | 8.5                                       |      |
| Ownership, %                 |                                 |                                     |      |                                  |                                      |       |                               |                                   |       |                                       |                                           |      |
| Non-federal government       | 26.7                            | 3.8                                 | .008 | 20.8                             | 2.9                                  | .006  | 24.0                          | 1.5                               | .001  | 11.5                                  | 6.1                                       | .423 |
| Nonprofit                    | 66.7                            | 84.8                                |      | 62.5                             | 88.6                                 |       | 68.0                          | 87.0                              |       | 80.8                                  | 82.9                                      |      |
| For profit                   | 6.7                             | 11.4                                |      | 16.7                             | 8.6                                  |       | 8.0                           | 11.6                              |       | 7.7                                   | 11.0                                      |      |
| Large Medicaid population, % |                                 |                                     |      |                                  |                                      |       |                               |                                   |       |                                       |                                           |      |
| No                           | 46.7                            | 17.7                                | .014 | 50.0                             | 12.9                                 | <.001 | 52.0                          | 11.6                              | <.001 | 30.8                                  | 18.3                                      | .014 |
| Yes                          | 53.3                            | 82.3                                |      | 50.0                             | 87.1                                 |       | 48.0                          | 88.4                              |       | 69.2                                  | 81.7                                      |      |
| Teaching status, %           |                                 |                                     |      |                                  |                                      |       |                               |                                   |       |                                       |                                           |      |
| Major teaching               | 13.3                            | 17.7                                | .025 | 12.5                             | 18.6                                 | .030  | 16.0                          | 17.4                              | .143  | 13.5                                  | 18.3                                      | .020 |
| Minor teaching               | 33.3                            | 62.0                                |      | 41.7                             | 62.9                                 |       | 44.0                          | 62.3                              |       | 55.8                                  | 61.0                                      |      |
| Nonteaching                  | 53.3                            | 20.3                                |      | 45.8                             | 18.6                                 |       | 40.0                          | 20.3                              |       | 30.8                                  | 20.7                                      |      |
| Region, %                    |                                 |                                     |      |                                  |                                      |       |                               |                                   |       |                                       |                                           |      |
| Northeast                    | 26.7                            | 11.4                                | .422 | 25.0                             | 10.0                                 | .257  | 24.0                          | 10.1                              | .142  | 19.2                                  | 11.0                                      | .171 |
| Midwest                      | 20.0                            | 22.8                                |      | 25.0                             | 21.4                                 |       | 28.0                          | 20.3                              |       | 26.9                                  | 22.0                                      |      |
| South                        | 33.3                            | 48.1                                |      | 37.5                             | 48.6                                 |       | 28.0                          | 52.2                              |       | 42.3                                  | 47.6                                      |      |
| West                         | 20.0                            | 17.7                                |      | 12.5                             | 20.0                                 |       | 20.0                          | 17.4                              |       | 11.5                                  | 19.5                                      |      |

**SUPPLEMENTAL TABLE 3** Social Needs Screening Practices Among Children's Hospitals by Hospital Characteristic (N = 79)

| Characteristic               | Any Social Need | P    | 5+Needs | P    | All Needs | P    | Housing | P    | Food | P    | Utilities | P    | Violence | P    | Transportation | P    | Employment/Income | P    | Education | P    | Social Isolation | P    |
|------------------------------|-----------------|------|---------|------|-----------|------|---------|------|------|------|-----------|------|----------|------|----------------|------|-------------------|------|-----------|------|------------------|------|
| Bed size, %                  |                 |      |         |      |           |      |         |      |      |      |           |      |          |      |                |      |                   |      |           |      |                  |      |
| <100                         | 71.9            | .250 | 46.8    | .092 | 26.5      | .070 | 57.6    | .157 | 49.3 | .008 | 36.7      | .487 | 55.7     | .006 | 51.7           | .036 | 40.6              | .090 | 45.4      | .019 | 67.1             | .216 |
| 100-400                      | 87.7            |      | 71.8    |      | 47.8      |      | 78.8    |      | 83.4 |      | 72.4      |      | 67.5     |      | 80.8           |      | 62.7              |      | 68.8      |      | 62.2             |      |
| >400                         | 85.8            |      | 57.5    |      | 13.7      |      | 71.2    |      | 85.8 |      | 70.7      |      | 72.2     |      | 70.8           |      | 28.7              |      | 13.7      |      | 28.9             |      |
| Ownership, %                 |                 |      |         |      |           |      |         |      |      |      |           |      |          |      |                |      |                   |      |           |      |                  |      |
| Non-federal government       | 34.0            | .068 | 0.0     | .007 | 0.0       | .216 | 0.0     | .002 | 0.0  | .000 | 0.0       | .020 | 0.0      | .021 | 0.0            | .001 | 0.0               | .058 | 0.0       | .172 | 34.0             | .567 |
| Nonprofit                    | 85.2            |      | 68.6    |      | 40.2      |      | 78.3    |      | 79.1 |      | 63.4      |      | 70.4     |      | 78.0           |      | 57.0              |      | 55.3      |      | 65.0             |      |
| For profit                   | 67.7            |      | 29.3    |      | 21.0      |      | 40.0    |      | 29.3 |      | 29.3      |      | 41.9     |      | 29.3           |      | 29.3              |      | 59.4      |      | 59.4             |      |
| Large Medicaid population, % |                 |      |         |      |           |      |         |      |      |      |           |      |          |      |                |      |                   |      |           |      |                  |      |
| No                           | 54.0            | .011 | 34.0    | .042 | 19.5      | .171 | 34.0    | .003 | 39.1 | .019 | 24.6      | .011 | 45.3     | .162 | 39.1           | .023 | 19.5              | .011 | 19.5      | .004 | 49.0             | .247 |
| Yes                          | 85.6            |      | 64.0    |      | 38.4      |      | 75.5    |      | 72.7 |      | 61.2      |      | 65.7     |      | 71.7           |      | 56.3              |      | 61.3      |      | 65.7             |      |
| Teaching status, %           |                 |      |         |      |           |      |         |      |      |      |           |      |          |      |                |      |                   |      |           |      |                  |      |
| Major teaching               | 92.9            | .421 | 70.7    | .139 | 42.5      | .717 | 70.5    | .487 | 92.9 | .007 | 77.9      | .215 | 78.1     | .522 | 92.9           | .025 | 42.5              | .378 | 49.6      | .763 | 56.8             | .514 |
| Minor teaching               | 75.5            |      | 63.3    |      | 35.7      |      | 71.6    |      | 71.8 |      | 53.3      |      | 59.5     |      | 68.4           |      | 55.4              |      | 51.2      |      | 59.3             |      |
| Nonteaching                  | 82.4            |      | 39.6    |      | 28.6      |      | 56.5    |      | 39.6 |      | 44.3      |      | 59.0     |      | 44.3           |      | 38.0              |      | 60.1      |      | 72.9             |      |
| Region, %                    |                 |      |         |      |           |      |         |      |      |      |           |      |          |      |                |      |                   |      |           |      |                  |      |
| Northeast                    | 76.1            | .607 | 46.3    | .156 | 22.2      | .079 | 56.9    | .263 | 76.1 | .519 | 41.2      | .086 | 65.6     | .130 | 76.1           | .650 | 22.2              | .058 | 22.2      | .125 | 57.1             | .220 |
| Midwest                      | 87.1            |      | 74.4    |      | 42.3      |      | 78.8    |      | 78.8 |      | 73.5      |      | 61.7     |      | 73.9           |      | 65.3              |      | 53.0      |      | 55.9             |      |
| South                        | 82.5            |      | 64.0    |      | 45.6      |      | 73.8    |      | 64.0 |      | 60.0      |      | 72.7     |      | 64.3           |      | 58.0              |      | 65.6      |      | 74.8             |      |
| West                         | 68.6            |      | 37.7    |      | 12.1      |      | 49.9    |      | 54.5 |      | 31.5      |      | 37.7     |      | 54.5           |      | 30.5              |      | 44.4      |      | 45.8             |      |

<sup>a</sup> Denotes significance using Bonferroni correction.

**SUPPLEMENTAL TABLE 4** Programs or Strategies in Place to Address Social Risks/Needs Among Children's Hospitals by Hospital Characteristic (N = 70)

| Characteristic               | Any Strategy | P     | 5+ Strategies | P    | All Strategies | P    | Housing | P                  | Food  | P                  | Utilities | P    | Violence | P    | Transportation | P                  | Employment/Income | P    | Education | P    | Social Isolation | P    |
|------------------------------|--------------|-------|---------------|------|----------------|------|---------|--------------------|-------|--------------------|-----------|------|----------|------|----------------|--------------------|-------------------|------|-----------|------|------------------|------|
| Bed size, %                  |              |       |               |      |                |      |         |                    |       |                    |           |      |          |      |                |                    |                   |      |           |      |                  |      |
| <100                         | 94.4         | .722  | 39.6          | .037 | 25.7           | .653 | 50.8    | .163               | 43.0  | .020               | 34.8      | .015 | 53.2     | .639 | 63.8           | .314               | 36.3              | .281 | 55.6      | .014 | 77.4             | .420 |
| 100-400                      | 97.4         |       | 58.9          |      | 35.1           |      | 54.3    |                    | 72.7  |                    | 58.6      |      | 63.3     |      | 74.6           |                    | 51.4              |      | 84.8      |      | 67.0             |      |
| >400                         | 100.0        |       | 100.0         |      | 34.9           |      | 100.0   |                    | 100.0 |                    | 100.0     |      | 68.2     |      | 100.0          |                    | 66.5              |      | 100.0     |      | 52.4             |      |
| Ownership, %                 |              |       |               |      |                |      |         |                    |       |                    |           |      |          |      |                |                    |                   |      |           |      |                  |      |
| Non-federal government       | 100.0        | 0.707 | 0.0           | .001 | 0.0            | .043 | 0.0     | <.001 <sup>a</sup> | 0.0   | <.001 <sup>a</sup> | 0.0       | .007 | 0.0      | .003 | 100.0          | <.001 <sup>a</sup> | 0.0               | .003 | 100.0     | .638 | 44.9             | .692 |
| Nonprofit                    | 94.8         |       | 68.2          |      | 40.1           |      | 72.9    |                    | 78.4  |                    | 62.2      |      | 73.4     |      | 84.1           |                    | 59.0              |      | 69.0      |      | 72.2             |      |
| For profit                   | 100.0        |       | 0.0           |      | 0.0            |      | 0.0     |                    | 0.0   |                    | 10.4      |      | 15.0     |      | 10.4           |                    | 0.0               |      | 72.2      |      | 74.6             |      |
| Large Medicaid population, % |              |       |               |      |                |      |         |                    |       |                    |           |      |          |      |                |                    |                   |      |           |      |                  |      |
| No                           | 100.0        | 0.478 | 25.5          | .075 | 25.5           | .713 | 45.6    | .538               | 37.0  | .145               | 25.5      | .107 | 44.9     | .382 | 79.1           | .557               | 25.5              | .186 | 59.1      | .401 | 70.0             | .933 |
| Yes                          | 95.3         |       | 56.3          |      | 31.3           |      | 57.0    |                    | 63.4  |                    | 53.3      |      | 60.9     |      | 69.3           |                    | 48.1              |      | 73.3      |      | 71.5             |      |
| Teaching status, %           |              |       |               |      |                |      |         |                    |       |                    |           |      |          |      |                |                    |                   |      |           |      |                  |      |
| Major teaching               | 100.0        | 0.753 | 91.7          | .016 | 46.2           | .146 | 76.2    | .129               | 100.0 | .001               | 84.0      | .042 | 69.1     | .511 | 100.0          | .001               | 68.7              | .071 | 91.7      | .256 | 69.5             | .971 |
| Minor teaching               | 96.0         |       | 52.3          |      | 34.0           |      | 59.1    |                    | 65.7  |                    | 49.7      |      | 61.3     |      | 79.7           |                    | 48.4              |      | 71.9      |      | 70.9             |      |
| Nonteaching                  | 94.2         |       | 31.6          |      | 14.8           |      | 36.8    |                    | 26.4  |                    | 31.6      |      | 47.5     |      | 36.8           |                    | 25.2              |      | 59.8      |      | 73.1             |      |
| Region, %                    |              |       |               |      |                |      |         |                    |       |                    |           |      |          |      |                |                    |                   |      |           |      |                  |      |
| Northeast                    | 100.0        | 0.772 | 34.8          | .017 | 22.4           | .009 | 52.1    | .023               | 47.9  | .363               | 34.8      | .004 | 62.8     | .027 | 100.0          | .033               | 34.8              | .008 | 57.1      | .545 | 100.0            | .281 |
| Midwest                      | 100          |       | 88.4          |      | 58.3           |      | 88.4    |                    | 81.6  |                    | 93.2      |      | 76.5     |      | 100.0          |                    | 75.6              |      | 88.4      |      | 71.1             |      |
| South                        | 94.8         |       | 55.8          |      | 36.2           |      | 59.7    |                    | 60.5  |                    | 48.5      |      | 69.0     |      | 61.3           |                    | 52.2              |      | 70.4      |      | 72.8             |      |
| West                         | 94.0         |       | 27.0          |      | 5.1            |      | 27.0    |                    | 47.6  |                    | 27.0      |      | 27.0     |      | 57.0           |                    | 15.4              |      | 66.5      |      | 58.0             |      |

<sup>a</sup> Denotes significance using Bonferroni correction.

**SUPPLEMENTAL TABLE 5 Partnerships with External Organizations to Meet Patient Social Needs Among Children's Hospitals**

| Characteristic            | Clinicians<br>(N = 80) | Insurance<br>Providers<br>(N = 77) | Health<br>Departments<br>(N = 77) | Other<br>Government<br>Agencies<br>(N = 76) | Faith-Based<br>Organizations<br>(N = 77) | Local Food<br>Organizations<br>(N = 76) | Local<br>Housing<br>Organizations<br>(N = 77) | Local<br>Transportation<br>Organizations<br>(N = 76) | Local Legal<br>Organizations<br>(N = 76) | Other<br>Nonprofits<br>(N = 76) | K-12 Schools<br>(N = 76) | Colleges/<br>Universities<br>(N = 77) | Local Businesses<br>(N = 77) | Law<br>Enforcement<br>(N = 79) | P    |                    |      |      |      |      |      |      |      |      |      |      |      |      |     |     |     |     |     |  |  |
|---------------------------|------------------------|------------------------------------|-----------------------------------|---------------------------------------------|------------------------------------------|-----------------------------------------|-----------------------------------------------|------------------------------------------------------|------------------------------------------|---------------------------------|--------------------------|---------------------------------------|------------------------------|--------------------------------|------|--------------------|------|------|------|------|------|------|------|------|------|------|------|------|-----|-----|-----|-----|-----|--|--|
| Bed Size                  |                        |                                    |                                   |                                             |                                          |                                         |                                               |                                                      |                                          |                                 |                          |                                       |                              |                                |      |                    |      |      |      |      |      |      |      |      |      |      |      |      |     |     |     |     |     |  |  |
| <100                      | 56.0                   | 77.1                               | 45.1                              | 2.00                                        | 47.9                                     | 50.7                                    | 15.8                                          | 3.98                                                 | 34.6                                     | 59.5                            | 40.8                     | 17.5                                  | 41.5                         | 3.39                           | 39.8 | .122               | 38.0 | 3.61 | 51.4 | 11.9 | 53.3 | 66.0 | 25.4 | 21.4 | 31.3 | 6.23 | 32.7 | .445 |     |     |     |     |     |  |  |
| 100-400                   | 53.5                   | 63.8                               | 61.2                              | 7.3                                         | 41.0                                     | 59.6                                    | 53.2                                          | 61.6                                                 | 41.7                                     | 74.2                            | 63.1                     | 44.6                                  | 25.7                         |                                |      |                    |      |      |      |      |      |      |      |      |      |      |      |      |     |     |     |     |     |  |  |
| >400                      | 40.1                   | 70.3                               | 55.5                              | 0.0                                         | 56.5                                     | 70.3                                    | 70.3                                          | 70.3                                                 | 70.3                                     | 70.3                            | 55.5                     | 28.2                                  | 13.3                         | 40.1                           |      |                    |      |      |      |      |      |      |      |      |      |      |      |      |     |     |     |     |     |  |  |
| Ownership                 |                        |                                    |                                   |                                             |                                          |                                         |                                               |                                                      |                                          |                                 |                          |                                       |                              |                                |      |                    |      |      |      |      |      |      |      |      |      |      |      |      |     |     |     |     |     |  |  |
| Non-federal government    | 0.0                    | 0.75                               | 0.0                               | 0.73                                        | 30.2                                     | 29.7                                    | 0.0                                           | 0.24                                                 | 0.0                                      | 0.24                            | 0.0                      | 0.058                                 | 0.0                          | 0.0                            | 0.0  | 0.0                | 0.0  | 0.0  | 0.0  | 0.0  | 0.0  | 0.0  | 0.0  | 0.0  | 0.0  | 0.0  | 0.0  | 0.0  | 0.0 | 0.0 | 0.0 | 0.0 |     |  |  |
| Nonprofit                 | 59.5                   | 57.0                               | 59.7                              | 7.8                                         | 44.1                                     | 61.4                                    | 58.0                                          | 58.1                                                 | 48.6                                     | 65.2                            | 55.5                     | 35.5                                  | 27.1                         | 37.2                           |      |                    |      |      |      |      |      |      |      |      |      |      |      |      |     |     |     |     |     |  |  |
| For-profit                | 51.6                   | 61.8                               | 51.6                              | 19.3                                        | 27.2                                     | 27.2                                    | 27.2                                          | 37.4                                                 | 27.2                                     | 57.3                            | 72.0                     | 37.4                                  | 37.4                         | 61.8                           |      |                    |      |      |      |      |      |      |      |      |      |      |      |      |     |     |     |     |     |  |  |
| Large Medicaid population |                        |                                    |                                   |                                             |                                          |                                         |                                               |                                                      |                                          |                                 |                          |                                       |                              |                                |      |                    |      |      |      |      |      |      |      |      |      |      |      |      |     |     |     |     |     |  |  |
| No                        | 36.1                   | 142                                | 139                               | 0.01                                        | 19.1                                     | 0.11                                    | 15.8                                          | 58.2                                                 | 8.1                                      | 0.16                            | 15.0                     | 0.006                                 | 18.7                         | 0.13                           | 5.4  | <.001 <sup>a</sup> | 14.7 | 0.35 | 36.9 | 0.64 | 32.7 | 0.62 | 22.6 | 37.3 | 28.9 | 92.9 | 0.0  | 0.0  | 0.0 | 0.0 | 0.0 | 0.0 |     |  |  |
| Yes                       | 58.2                   | 62.3                               | 61.3                              | 10.3                                        | 44.9                                     | 58.1                                    | 54.8                                          | 60.5                                                 | 46.9                                     | 66.9                            | 62.2                     | 35.8                                  | 27.5                         | 48.0                           |      |                    |      |      |      |      |      |      |      |      |      |      |      |      |     |     |     |     |     |  |  |
| Teaching Status           |                        |                                    |                                   |                                             |                                          |                                         |                                               |                                                      |                                          |                                 |                          |                                       |                              |                                |      |                    |      |      |      |      |      |      |      |      |      |      |      |      |     |     |     |     |     |  |  |
| Major teaching            | 69.9                   | 460                                | 70.3                              | 4.31                                        | 64.1                                     | 7.77                                    | 8.4                                           | 63.1                                                 | 62.9                                     | 26.3                            | 77.4                     | 18.4                                  | 88.0                         | 2.00                           | 91.7 | .030               | 63.2 | 3.35 | 78.7 | 4.66 | 71.2 | 1.91 | 42.6 | 41.5 | 28.0 | 87.1 | 57.0 | 23.1 |     |     |     |     |     |  |  |
| Minor teaching            | 49.2                   | 49.5                               | 52.0                              | 9.2                                         | 36.0                                     | 49.0                                    | 50.9                                          | 41.9                                                 | 40.3                                     | 58.1                            | 49.0                     | 27.6                                  | 25.8                         | 31.8                           |      |                    |      |      |      |      |      |      |      |      |      |      |      |      |     |     |     |     |     |  |  |
| Nonteaching               | 57.5                   | 59.6                               | 53.2                              | 16.7                                        | 33.2                                     | 41.7                                    | 33.2                                          | 53.1                                                 | 34.6                                     | 63.5                            | 69.1                     | 42.0                                  | 31.7                         | 47.5                           |      |                    |      |      |      |      |      |      |      |      |      |      |      |      |     |     |     |     |     |  |  |
| Region                    |                        |                                    |                                   |                                             |                                          |                                         |                                               |                                                      |                                          |                                 |                          |                                       |                              |                                |      |                    |      |      |      |      |      |      |      |      |      |      |      |      |     |     |     |     |     |  |  |
| Northeast                 | 34.6                   | 562                                | 33.9                              | 5.54                                        | 24.3                                     | 0.42                                    | 0.0                                           | 23.4                                                 | 22.6                                     | 7.64                            | 33.8                     | 4.30                                  | 59.7                         | 2.66                           | 33.8 | .504               | 72.4 | 0.78 | 58.7 | 4.32 | 24.3 | 1.41 | 35.3 | 87.6 | 39.5 | 4.05 | 0.0  | 0.0  | 0.0 | 0.0 | 0.0 | 0.0 | 0.0 |  |  |
| Midwest                   | 54.0                   | 64.5                               | 62.7                              | 6.2                                         | 44.7                                     | 68.8                                    | 68.9                                          | 67.2                                                 | 62.7                                     | 72.0                            | 64.9                     | 43.0                                  | 16.2                         | 32.4                           |      |                    |      |      |      |      |      |      |      |      |      |      |      |      |     |     |     |     |     |  |  |
| South                     | 52.9                   | 52.6                               | 44.3                              | 18.3                                        | 39.0                                     | 46.1                                    | 37.1                                          | 46.7                                                 | 28.9                                     | 53.0                            | 54.6                     | 30.6                                  | 23.5                         | 39.0                           |      |                    |      |      |      |      |      |      |      |      |      |      |      |      |     |     |     |     |     |  |  |
| West                      | 64.3                   | 60.8                               | 78.3                              | 4.8                                         | 41.4                                     | 53.1                                    | 49.4                                          | 53.7                                                 | 41.0                                     | 74.0                            | 73.3                     | 31.6                                  | 39.8                         | 61.1                           |      |                    |      |      |      |      |      |      |      |      |      |      |      |      |     |     |     |     |     |  |  |

<sup>a</sup> Denotes significance using Bonferroni correction.

**SUPPLEMENTAL TABLE 6** Partnerships with External Organizations to Implement Community-Level Initiatives to Address Social Risks by Hospital Characteristic

| Characteristic               | Clinicians<br>(N = 80) | Insurance<br>Providers<br>(N = 77) | Health<br>Departments<br>(N = 77) | Other<br>Government<br>Agencies<br>(N = 76) | Faith-Based<br>Organizations<br>(N = 77) | Local Food<br>Organizations<br>(N = 78) | Local Housing<br>Organizations<br>(N = 77) | Local<br>Transportation<br>Organizations<br>(N = 75) | Local Legal<br>Organizations<br>(N = 78) | Other<br>Nonprofits<br>(N = 78) | K-12 Schools<br>(N = 78) | Colleges/<br>Universities<br>(N = 77) | Local<br>Businesses<br>(N = 77) | Law<br>Enforcement<br>(N = 79) |      |      |       |      |
|------------------------------|------------------------|------------------------------------|-----------------------------------|---------------------------------------------|------------------------------------------|-----------------------------------------|--------------------------------------------|------------------------------------------------------|------------------------------------------|---------------------------------|--------------------------|---------------------------------------|---------------------------------|--------------------------------|------|------|-------|------|
|                              | P                      | P                                  | P                                 | P                                           | P                                        | P                                       | P                                          | P                                                    | P                                        | P                               | P                        | P                                     | P                               | P                              |      |      |       |      |
| Bed size, %                  |                        |                                    |                                   |                                             |                                          |                                         |                                            |                                                      |                                          |                                 |                          |                                       |                                 |                                |      |      |       |      |
| <100                         | 18.0                   | .001                               | 20.7                              | <.001*                                      | 34.6                                     | .018                                    | 51.6                                       | .159                                                 | 9.4                                      | .001                            | 2.4                      | <.001*                                | 19.9                            | <.001*                         | 12.3 | .002 | 16.0  | .001 |
| 100-400                      | 45.0                   |                                    | 44.9                              |                                             | 41.0                                     |                                         | 36.0                                       |                                                      | 22.4                                     |                                 | 29.1                     |                                       | 72.5                            |                                | 36.0 |      | 52.1  |      |
| >400                         | 85.9                   |                                    | 71.1                              |                                             | 55.5                                     |                                         | 14.1                                       |                                                      | 72.5                                     |                                 | 70.5                     |                                       | 85.2                            |                                | 71.1 |      | 71.1  |      |
| Ownership, %                 |                        |                                    |                                   |                                             |                                          |                                         |                                            |                                                      |                                          |                                 |                          |                                       |                                 |                                |      |      |       |      |
| Non-federal government       | 23.0                   | .016                               | 0.0                               | .031                                        | 0.0                                      | .096                                    | 0.0                                        | .054                                                 | 0.0                                      | .034                            | 0.0                      | .0265                                 | 0.0                             | .265                           | 0.0  | .040 | 100.0 | .004 |
| Nonprofit                    | 43.0                   |                                    | 34.5                              |                                             | 46.5                                     |                                         | 46.5                                       |                                                      | 44.1                                     |                                 | 40.1                     |                                       | 25.6                            |                                | 24.8 |      | 25.6  |      |
| For profit                   | 0.0                    |                                    | 0.0                               |                                             | 10.2                                     |                                         | 72.8                                       |                                                      | 27.2                                     |                                 | 8.7                      |                                       | 0.0                             |                                | 0.0  |      | 0.0   |      |
| Large Medicaid population, % |                        |                                    |                                   |                                             |                                          |                                         |                                            |                                                      |                                          |                                 |                          |                                       |                                 |                                |      |      |       |      |
| No                           | 19.7                   | .210                               | 0.0                               | .028                                        | 0.0                                      | <.001                                   | 74.0                                       | .010                                                 | 15.2                                     | .556                            | 6.1                      | 0.162                                 | 17.0                            | .030                           | 10.7 | .016 | 5.4   | .018 |
| Yes                          | 37.1                   |                                    | 30.8                              |                                             | 54.4                                     |                                         | 35.7                                       |                                                      | 20.0                                     |                                 | 55.1                     |                                       | 52.7                            |                                | 55.1 |      | 35.7  |      |
| Teaching status, %           |                        |                                    |                                   |                                             |                                          |                                         |                                            |                                                      |                                          |                                 |                          |                                       |                                 |                                |      |      |       |      |
| Major teaching               | 78.7                   | .002                               | 36.7                              | .089                                        | 64.1                                     | .236                                    | 48.6                                       | .497                                                 | 62.9                                     | .265                            | 71.6                     | .002                                  | 16.7                            | .111                           | 40.9 | .150 | 35.1  | .064 |
| Minor teaching               | 31.1                   |                                    | 31.0                              |                                             | 46.4                                     |                                         | 38.7                                       |                                                      | 36.0                                     |                                 | 31.3                     |                                       | 17.5                            |                                | 17.5 |      | 21.4  |      |
| Nonteaching                  | 18.8                   |                                    | 9.1                               |                                             | 32.8                                     |                                         | 28.4                                       |                                                      | 35.2                                     |                                 | 12.9                     |                                       | 12.9                            |                                | 12.9 |      | 4.5   |      |
| Region, %                    |                        |                                    |                                   |                                             |                                          |                                         |                                            |                                                      |                                          |                                 |                          |                                       |                                 |                                |      |      |       |      |
| Northeast                    | 20.3                   | .231                               | 0.0                               | .189                                        | 12.1                                     | .069                                    | 12.1                                       | .077                                                 | 22.6                                     | .764                            | 47.5                     | .027                                  | 26.6                            | .327                           | 55.3 | .035 | 26.3  | .133 |
| Midwest                      | 50.6                   |                                    | 42.1                              |                                             | 72.1                                     |                                         | 65.7                                       |                                                      | 44.7                                     |                                 | 60.3                     |                                       | 24.6                            |                                | 41.7 |      | 39.1  |      |
| South                        | 37.2                   |                                    | 24.5                              |                                             | 44.7                                     |                                         | 52.2                                       |                                                      | 39.0                                     |                                 | 26.1                     |                                       | 13.8                            |                                | 13.8 |      | 13.7  |      |
| West                         | 20.9                   |                                    | 28.3                              |                                             | 39.0                                     |                                         | 44.7                                       |                                                      | 41.4                                     |                                 | 15.3                     |                                       | 5.9                             |                                | 5.9  |      | 11.2  |      |

\* No findings remained significant using Bonferroni correction.

| <b>SUPPLEMENTAL TABLE 7</b> Measurement of Impact of Interventions to Address Patient Social Risks/Needs Among Children's Hospitals |                                                  |          |                                                           |          |                                                                |          |                                                         |          |                                                                     |          |
|-------------------------------------------------------------------------------------------------------------------------------------|--------------------------------------------------|----------|-----------------------------------------------------------|----------|----------------------------------------------------------------|----------|---------------------------------------------------------|----------|---------------------------------------------------------------------|----------|
| <b>Characteristic</b>                                                                                                               | <b>Assesses Screening Effectiveness (N = 82)</b> | <b>P</b> | <b>Assesses Effectiveness in Health Outcomes (N = 33)</b> | <b>P</b> | <b>Assesses Effectiveness in Utilization Outcomes (N = 33)</b> | <b>P</b> | <b>Assesses Effectiveness in Cost Outcomes (N = 33)</b> | <b>P</b> | <b>Assesses Effectiveness in Community Health Outcomes (N = 33)</b> | <b>P</b> |
| Bed size, %                                                                                                                         |                                                  |          |                                                           |          |                                                                |          |                                                         |          |                                                                     |          |
| <100                                                                                                                                | 32.9                                             | .387     | 45.0                                                      | .200     | 63.5                                                           | .381     | 23.2                                                    | .184     | 32.1                                                                | .078     |
| 100–400                                                                                                                             | 44.1                                             |          | 55.8                                                      |          | 60.0                                                           |          | 55.1                                                    |          | 54.5                                                                |          |
| >400                                                                                                                                | 57.1                                             |          | 100.0                                                     |          | 100.0                                                          |          | 50.4                                                    |          | 100.0                                                               |          |
| Ownership, %                                                                                                                        |                                                  |          |                                                           |          |                                                                |          |                                                         |          |                                                                     |          |
| Non-federal government                                                                                                              | 25.3                                             | .821     | 0.0                                                       | .400     | 100.0                                                          | .538     | 0.0                                                     | .628     | 0.0                                                                 | .528     |
| Nonprofit                                                                                                                           | 40.6                                             |          | 60.8                                                      |          | 66.9                                                           |          | 42.2                                                    |          | 52.8                                                                |          |
| For profit                                                                                                                          | 39.9                                             |          | 47.5                                                      |          | 47.5                                                           |          | 47.5                                                    |          | 47.5                                                                |          |
| Large Medicaid population, %                                                                                                        |                                                  |          |                                                           |          |                                                                |          |                                                         |          |                                                                     |          |
| No                                                                                                                                  | 26.1                                             | .256     | 39.4                                                      | .489     | 78.5                                                           | .536     | 0.0                                                     | .066     | 17.8                                                                | .135     |
| Yes                                                                                                                                 | 42.5                                             |          | 57.8                                                      |          | 63.2                                                           |          | 47.2                                                    |          | 54.0                                                                |          |
| Teaching status, %                                                                                                                  |                                                  |          |                                                           |          |                                                                |          |                                                         |          |                                                                     |          |
| Major teaching                                                                                                                      | 46.7                                             | .638     | 56.2                                                      | .709     | 84.5                                                           | .285     | 42.0                                                    | .563     | 56.2                                                                | .867     |
| Minor teaching                                                                                                                      | 40.9                                             |          | 59.7                                                      |          | 68.0                                                           |          | 46.6                                                    |          | 49.8                                                                |          |
| Nonteaching                                                                                                                         | 31.2                                             |          | 41.2                                                      |          | 41.2                                                           |          | 22.5                                                    |          | 41.2                                                                |          |
| Region, %                                                                                                                           |                                                  |          |                                                           |          |                                                                |          |                                                         |          |                                                                     |          |
| Northeast                                                                                                                           | 8.5                                              | .103     | 100.0                                                     | .531     | 100.0                                                          | .727     | 0.0                                                     | .627     | 100.0                                                               | .339     |
| Midwest                                                                                                                             | 27.2                                             |          | 80.3                                                      |          | 80.3                                                           |          | 63.6                                                    |          | 80.3                                                                |          |
| South                                                                                                                               | 48.4                                             |          | 50.6                                                      |          | 58.9                                                           |          | 40.1                                                    |          | 45.4                                                                |          |
| West                                                                                                                                | 45.5                                             |          | 48.9                                                      |          | 67.6                                                           |          | 35.1                                                    |          | 37.2                                                                |          |



## SUPPLEMENTAL DOCUMENT 1. AMERICAN HOSPITAL ASSOCIATION 2020 ANNUAL SURVEY SOCIAL RISK FACTOR QUESTIONS

Used with permission. American Hospital Association. Derived from: [www.ahadata.com/system/files/media/file/2021/06/2020AHAAnnual.pdf](http://www.ahadata.com/system/files/media/file/2021/06/2020AHAAnnual.pdf)

1. Which social needs of patients/social determinants of health in communities does your hospital or health system have programs or strategies to address? (Check all that apply)
  - a.  Housing (instability, quality, financing)
  - b.  Food insecurity or hunger
  - c.  Utility needs
  - d.  Interpersonal violence
  - e.  Transportation
  - f.  Employment and income
  - g.  Education
  - h.  Social isolation (lack of family and social support)
  - i.  Health behaviors
  - j.  Other, please describe: \_\_\_\_\_
2. Does your hospital or health system screen patients for social needs?
 

Yes, for all patients  Yes, for some patients  No (skip to question 3)
- 2a. If yes, please indicate which social needs are assessed. (Check all that apply)
  1.  Housing (instability, quality, financing)
  2.  Food insecurity or hunger
  3.  Utility needs
  4.  Interpersonal violence
  5.  Transportation
  6.  Employment and income
  7.  Education
  8.  Social isolation (lack of family and social support)
  9.  Health behaviors
  10.  Other, please describe: \_\_\_\_\_
- 2b. If yes, does your hospital or health system record the social needs screening results in your electronic health?
 

Yes  No
3. Does your hospital or health system use outcome measures (for example, cost of care or readmission rates) to assess the effectiveness of the interventions to address patients' social needs?
 

Yes  No
4. Has your hospital or health system been able to gather data indicating that activities used to address the social determinants of health and patient social needs have resulted in any of the following? (Check all that apply)
  11.  Better health outcomes for patients
  12.  Decreased utilization of hospital or health system services
  13.  Decreased health care costs
  14.  Improved community health status
5. Please indicate the extent of your hospital's current partnerships with external partners for population and/or community health initiatives. Which types of organizations do you currently partner with in each of the following activities? (Check all that apply)

|                                                                             |                       | Work Together to Meet Patient Social Needs (eg, Referral Arrangement or Case Management) | Participates in our Community Health Needs Assessment Process | Work Together to Implement Community-Level Initiatives to Address Social Determinants of Health |
|-----------------------------------------------------------------------------|-----------------------|------------------------------------------------------------------------------------------|---------------------------------------------------------------|-------------------------------------------------------------------------------------------------|
| a. Health care providers outside your system                                | <input type="radio"/> | <input type="radio"/>                                                                    | <input type="radio"/>                                         | <input type="radio"/>                                                                           |
| b. Health insurance providers outside of your system                        | <input type="radio"/> | <input type="radio"/>                                                                    | <input type="radio"/>                                         | <input type="radio"/>                                                                           |
| c. Local or state public health departments/ organizations                  | <input type="radio"/> | <input type="radio"/>                                                                    | <input type="radio"/>                                         | <input type="radio"/>                                                                           |
| d. Other local or state government agencies or social service organizations | <input type="radio"/> | <input type="radio"/>                                                                    | <input type="radio"/>                                         | <input type="radio"/>                                                                           |
| e. Faith-based organizations                                                | <input type="radio"/> | <input type="radio"/>                                                                    | <input type="radio"/>                                         | <input type="radio"/>                                                                           |
| f. Local organizations addressing food insecurity                           | <input type="radio"/> | <input type="radio"/>                                                                    | <input type="radio"/>                                         | <input type="radio"/>                                                                           |
| g. Local organizations addressing housing insecurity                        | <input type="radio"/> | <input type="radio"/>                                                                    | <input type="radio"/>                                         | <input type="radio"/>                                                                           |
| h. Local organizations addressing transportation needs                      | <input type="radio"/> | <input type="radio"/>                                                                    | <input type="radio"/>                                         | <input type="radio"/>                                                                           |
| i. Local organizations providing legal assistance for individuals           | <input type="radio"/> | <input type="radio"/>                                                                    | <input type="radio"/>                                         | <input type="radio"/>                                                                           |
| j. Other community nonprofit organizations                                  | <input type="radio"/> | <input type="radio"/>                                                                    | <input type="radio"/>                                         | <input type="radio"/>                                                                           |
| k. K-12 schools                                                             | <input type="radio"/> | <input type="radio"/>                                                                    | <input type="radio"/>                                         | <input type="radio"/>                                                                           |
| l. Colleges or universities                                                 | <input type="radio"/> | <input type="radio"/>                                                                    | <input type="radio"/>                                         | <input type="radio"/>                                                                           |
| m. Local businesses or chambers of commerce                                 | <input type="radio"/> | <input type="radio"/>                                                                    | <input type="radio"/>                                         | <input type="radio"/>                                                                           |
| n. Law enforcement/safety forces                                            | <input type="radio"/> | <input type="radio"/>                                                                    | <input type="radio"/>                                         | <input type="radio"/>                                                                           |
